# Supplementary material for: Comparison of vaccination and booster rates and their impact on excess mortality during the COVID-19 pandemic in European countries
Source: PubMed Central journal article supplement (PMC10357837; doi:10.3389/fimmu.2023.1151311), 2023-07-06
Supplement: Image_1.pdf [file Image_1.pdf]

All countries were categorized according to their "faster" or "slower" vaccination rates. The first category included countries that reached 60% of vaccinated residents by October 2021 and 70% by January 2022. The second or "slower" category included all other countries.

## February 1, 2021

Share of people who completed the initial COVID-19 vaccination protocol, Feb 1, 2021

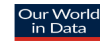

Total number of people who received all doses prescribed by the initial vaccination protocol, divided by the total population of the country.

1 %

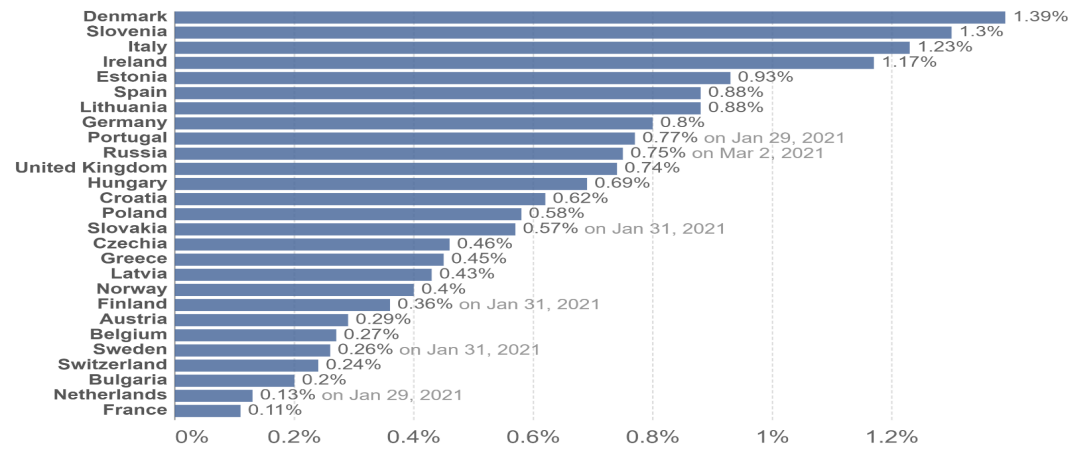

Source: Official data collated by Our World in Data  
 Note: Alternative definitions of a full vaccination, e.g. having been infected with SARS-CoV-2 and having 1 dose of a 2-dose protocol, are ignored to maximize comparability between countries.

CC BY

## June 1, 2021

Share of people who completed the initial COVID-19 vaccination protocol, Jun 1, 2021

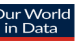

Total number of people who received all doses prescribed by the initial vaccination protocol, divided by the total population of the country.

39%

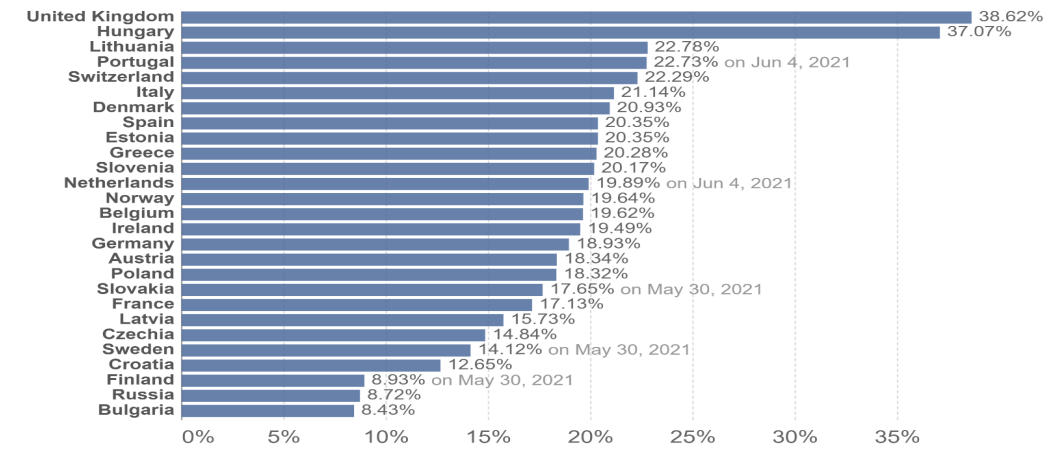

Source: Official data collated by Our World in Data  
 Note: Alternative definitions of a full vaccination, e.g. having been infected with SARS-CoV-2 and having 1 dose of a 2-dose protocol, are ignored to maximize comparability between countries.

CC BY

## July 2, 2021

Share of people who completed the initial COVID-19 vaccination protocol, Jul 2, 2021

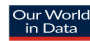

Total number of people who received all doses prescribed by the initial vaccination protocol, divided by the total population of the country.

50 %

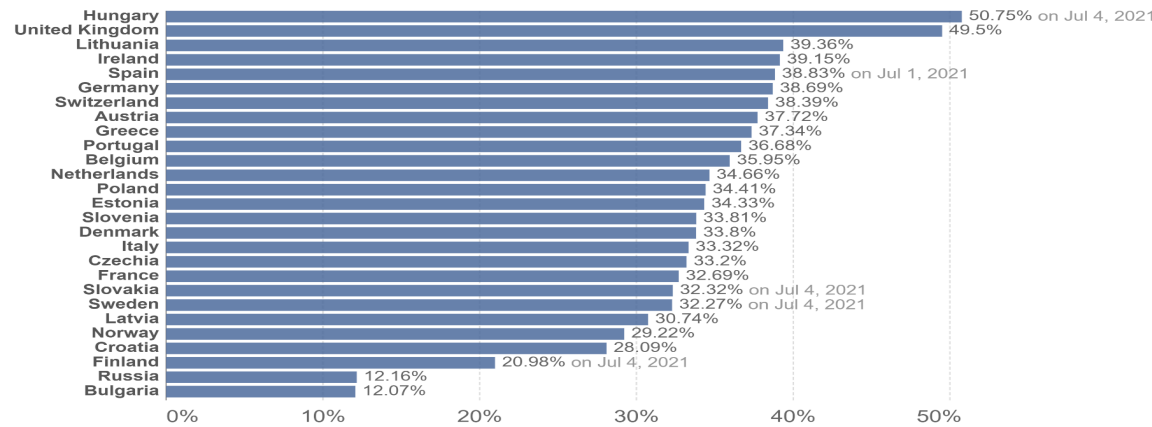

Source: Official data collated by Our World in Data  
 Note: Alternative definitions of a full vaccination, e.g. having been infected with SARS-CoV-2 and having 1 dose of a 2-dose protocol, are ignored to maximize comparability between countries.

CC BY

## October 2, 2021

Share of people who completed the initial COVID-19 vaccination protocol, Oct 2, 2021

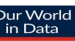

Total number of people who received all doses prescribed by the initial vaccination protocol, divided by the total population of the country.

80%

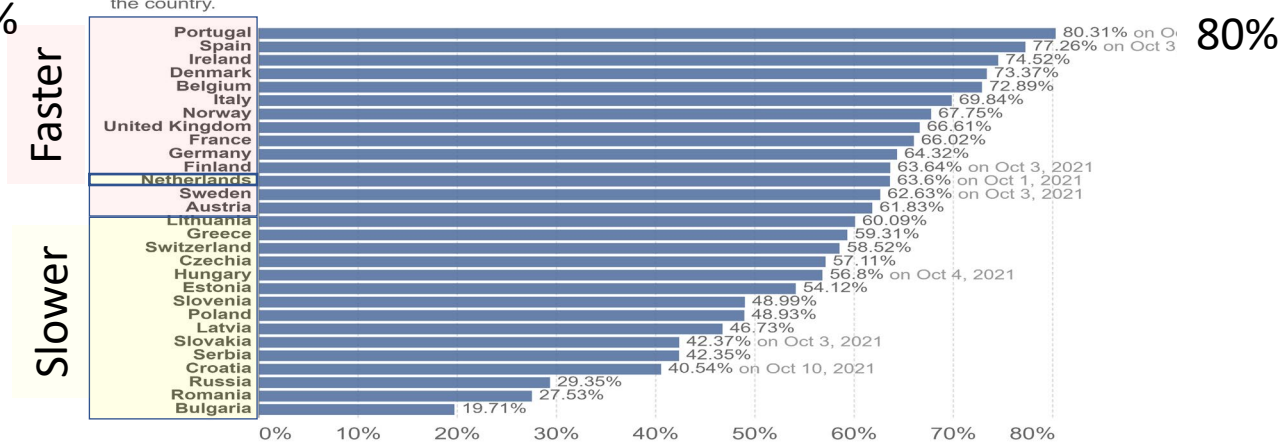

Source: Official data collated by Our World in Data  
 Note: Alternative definitions of a full vaccination, e.g. having been infected with SARS-CoV-2 and having 1 dose of a 2-dose protocol, are ignored to maximize comparability between countries.

CC BY

## Vaccine types distribution as of May 30, 2022 in EU

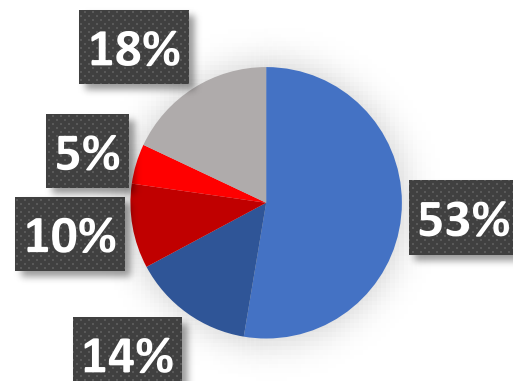

- Comirnaty (Pfizer), RNA vaccine
- Spikevax (Moderna), RNA vaccine
- Vaxzevria (AstraZeneca), adenovirus-vector vaccine
- Janssen (Johnson and Johnson), adenovirus-vector vaccine
- Unknown
