# Supplementary material for: Comparison of vaccination and booster rates and their impact on excess mortality during the COVID-19 pandemic in European countries
Source: PubMed Central journal article supplement (PMC10357837; doi:10.3389/fimmu.2023.1151311), 2023-07-06
Supplement: Image_2.pdf [file Image_2.pdf]

# July 5, 2021

## SARS-CoV-2 sequences by variant, Jul 5, 2021

The share of analyzed sequences in the preceding two weeks that correspond to each variant group.

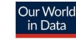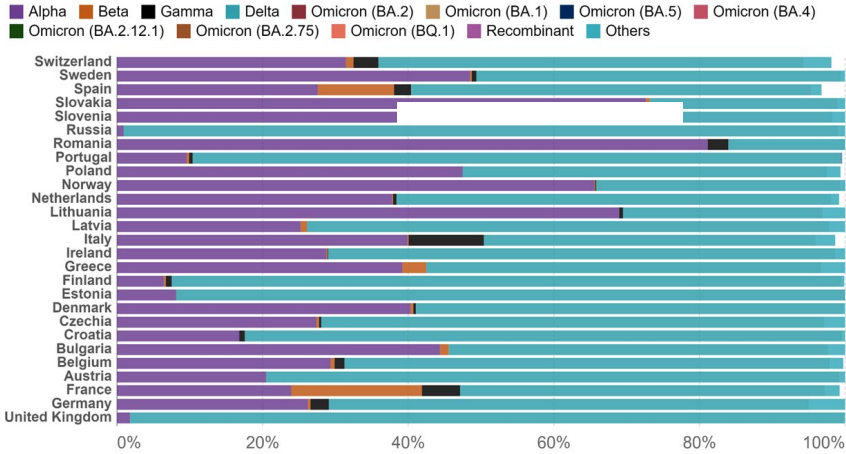

Source: GISAID, via CoVariants.org CC BY  
 Note: This share may not reflect the complete breakdown of cases, since only a fraction of all cases are sequenced. Recently-discovered or actively-monitored variants may be overrepresented, as suspected cases of these variants are likely to be sequenced preferentially or faster than other cases.

# December 6, 2021

## SARS-CoV-2 sequences by variant, Dec 6, 2021

The share of analyzed sequences in the preceding two weeks that correspond to each variant group.

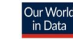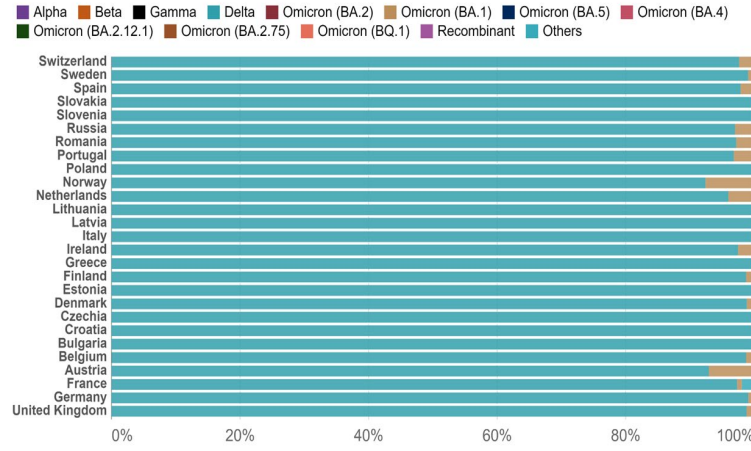

Source: GISAID, via CoVariants.org CC BY  
 Note: This share may not reflect the complete breakdown of cases, since only a fraction of all cases are sequenced. Recently-discovered or actively-monitored variants may be overrepresented, as suspected cases of these variants are likely to be sequenced preferentially or faster than other cases.

# January 31, 2022

## SARS-CoV-2 sequences by variant, Jan 31, 2022

The share of analyzed sequences in the preceding two weeks that correspond to each variant group.

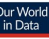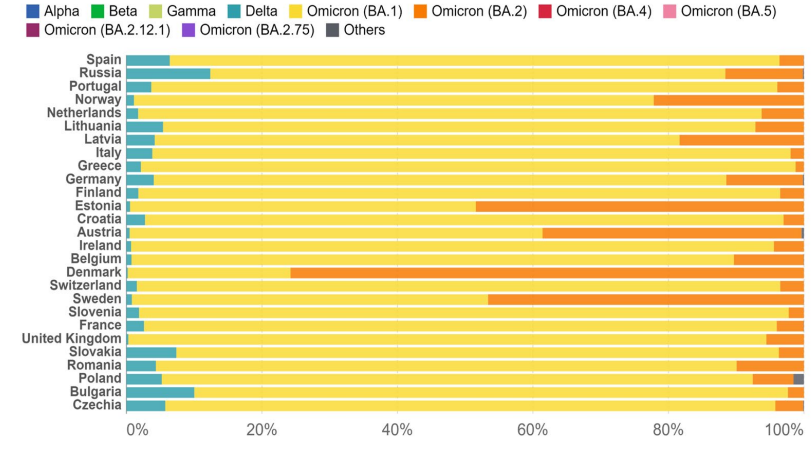

Source: GISAID, via CoVariants.org CC BY  
 Note: This share may not reflect the complete breakdown of cases, since only a fraction of all cases are sequenced. Recently-discovered or actively-monitored variants may be overrepresented, as suspected cases of these variants are likely to be sequenced preferentially or faster than other cases.

# May 23, 2022

## SARS-CoV-2 sequences by variant, May 23, 2022

The share of analyzed sequences in the preceding two weeks that correspond to each variant group.

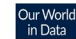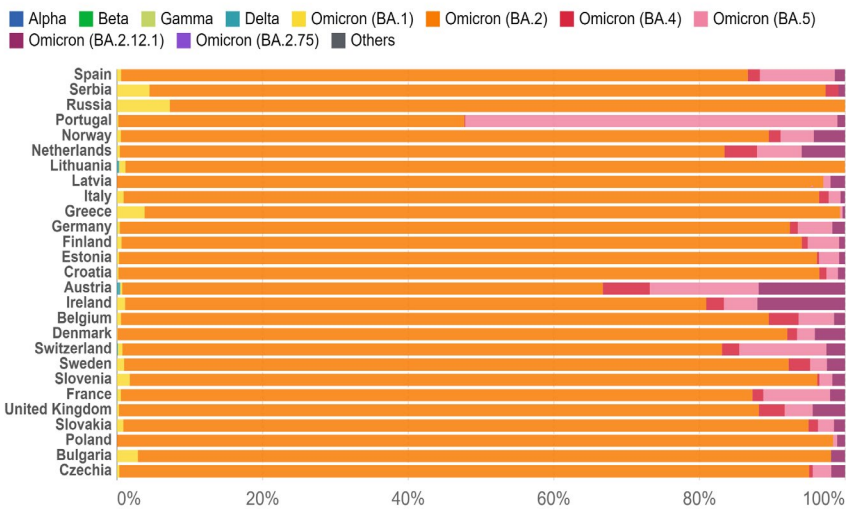

Source: GISAID, via CoVariants.org CC BY  
 Note: This share may not reflect the complete breakdown of cases, since only a fraction of all cases are sequenced. Recently-discovered or actively-monitored variants may be overrepresented, as suspected cases of these variants are likely to be sequenced preferentially or faster than other cases.

# June 20, 2022

## SARS-CoV-2 sequences by variant, Jun 20, 2022

The share of analyzed sequences in the preceding two weeks that correspond to each variant group.

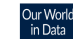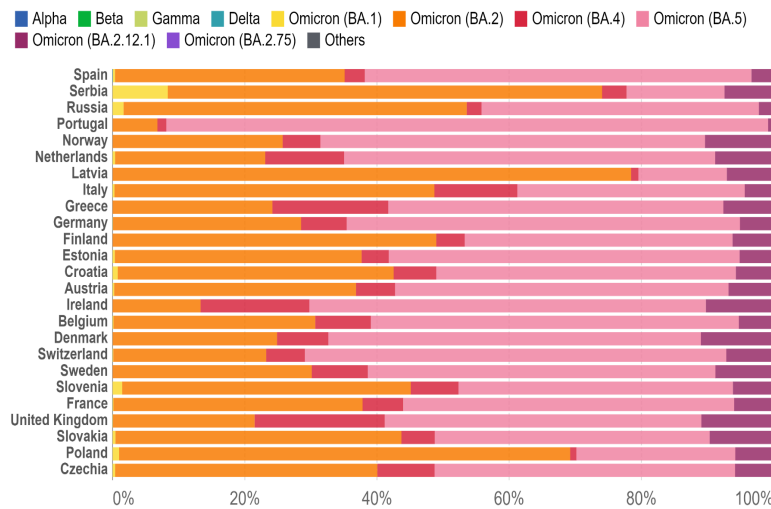

Source: GISAID, via CoVariants.org CC BY  
 Note: This share may not reflect the complete breakdown of cases, since only a fraction of all cases are sequenced. Recently-discovered or actively-monitored variants may be overrepresented, as suspected cases of these variants are likely to be sequenced preferentially or faster than other cases.

# August 29, 2022

## SARS-CoV-2 sequences by variant, Aug 29, 2022

The share of analyzed sequences in the preceding two weeks that correspond to each variant group.

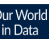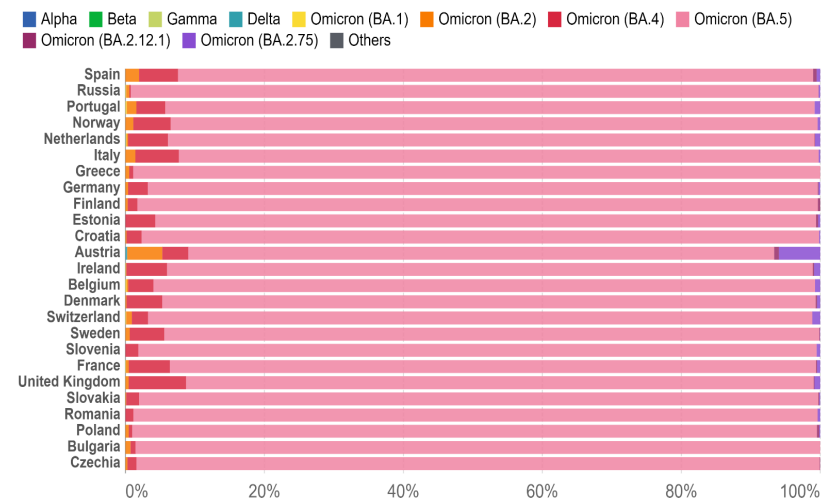

Source: GISAID, via CoVariants.org CC BY  
 Note: This share may not reflect the complete breakdown of cases, since only a fraction of all cases are sequenced. Recently-discovered or actively-monitored variants may be overrepresented, as suspected cases of these variants are likely to be sequenced preferentially or faster than other cases.
