# Supplementary material for: Comparison of vaccination and booster rates and their impact on excess mortality during the COVID-19 pandemic in European countries
Source: PubMed Central journal article supplement (PMC10357837; doi:10.3389/fimmu.2023.1151311), 2023-07-06
Supplement: Image_3.pdf [file Image_3.pdf]

## Countries with slower vaccination

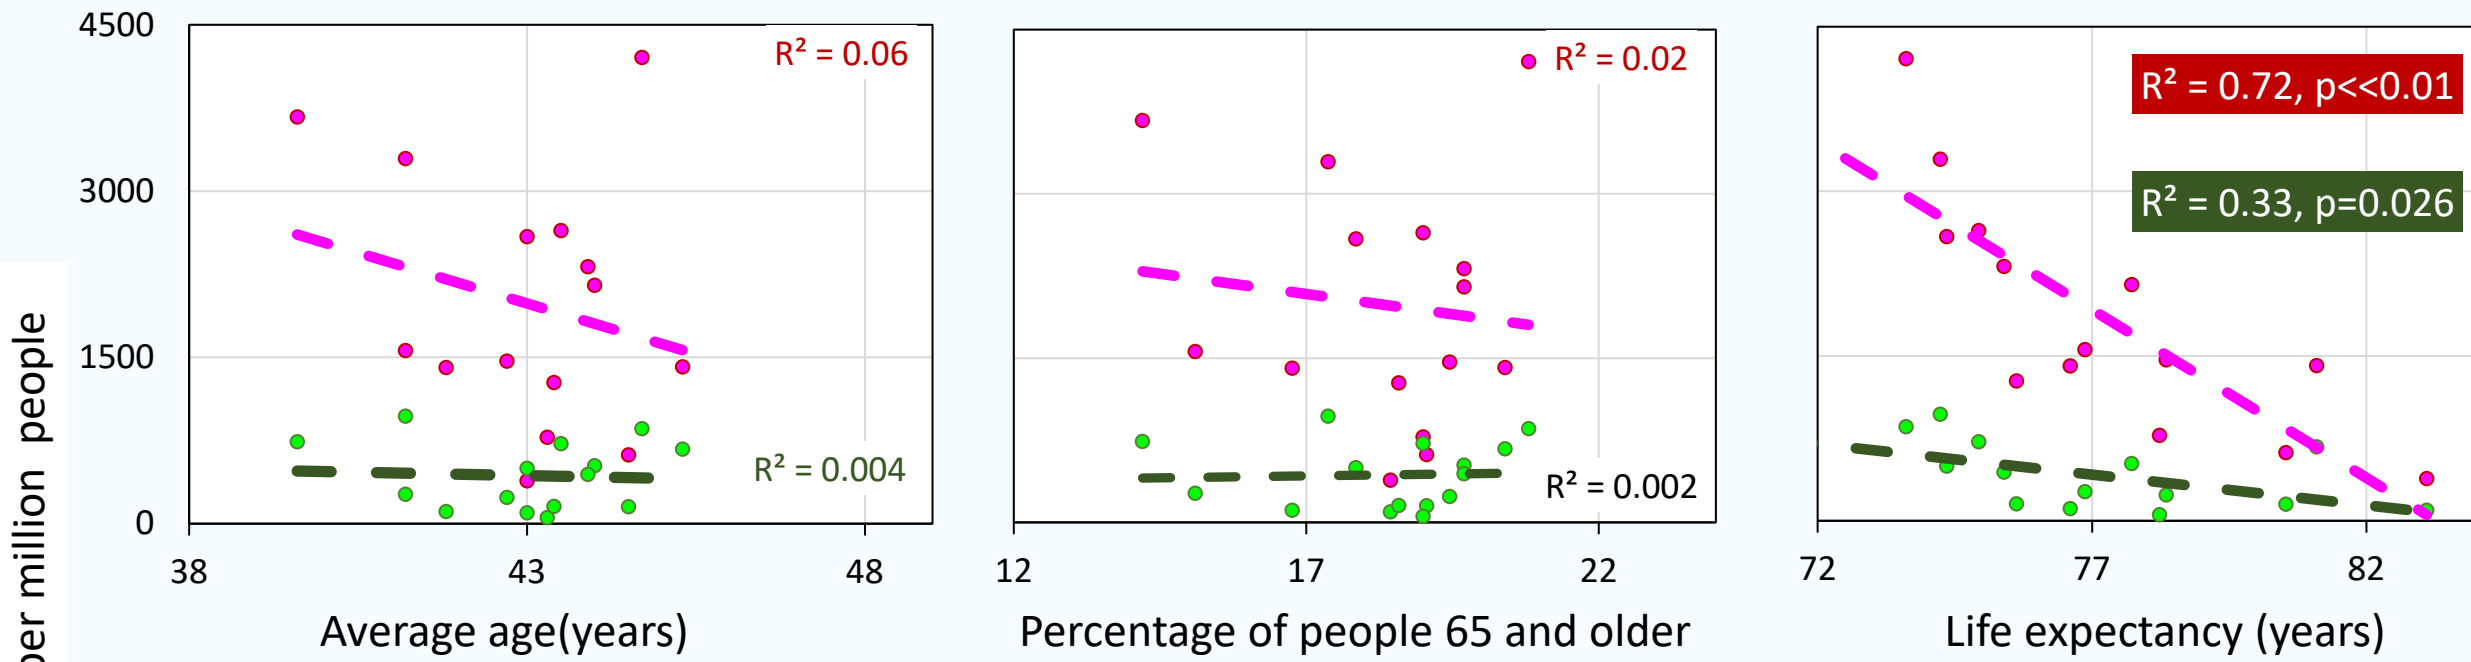

## Countries with faster vaccination

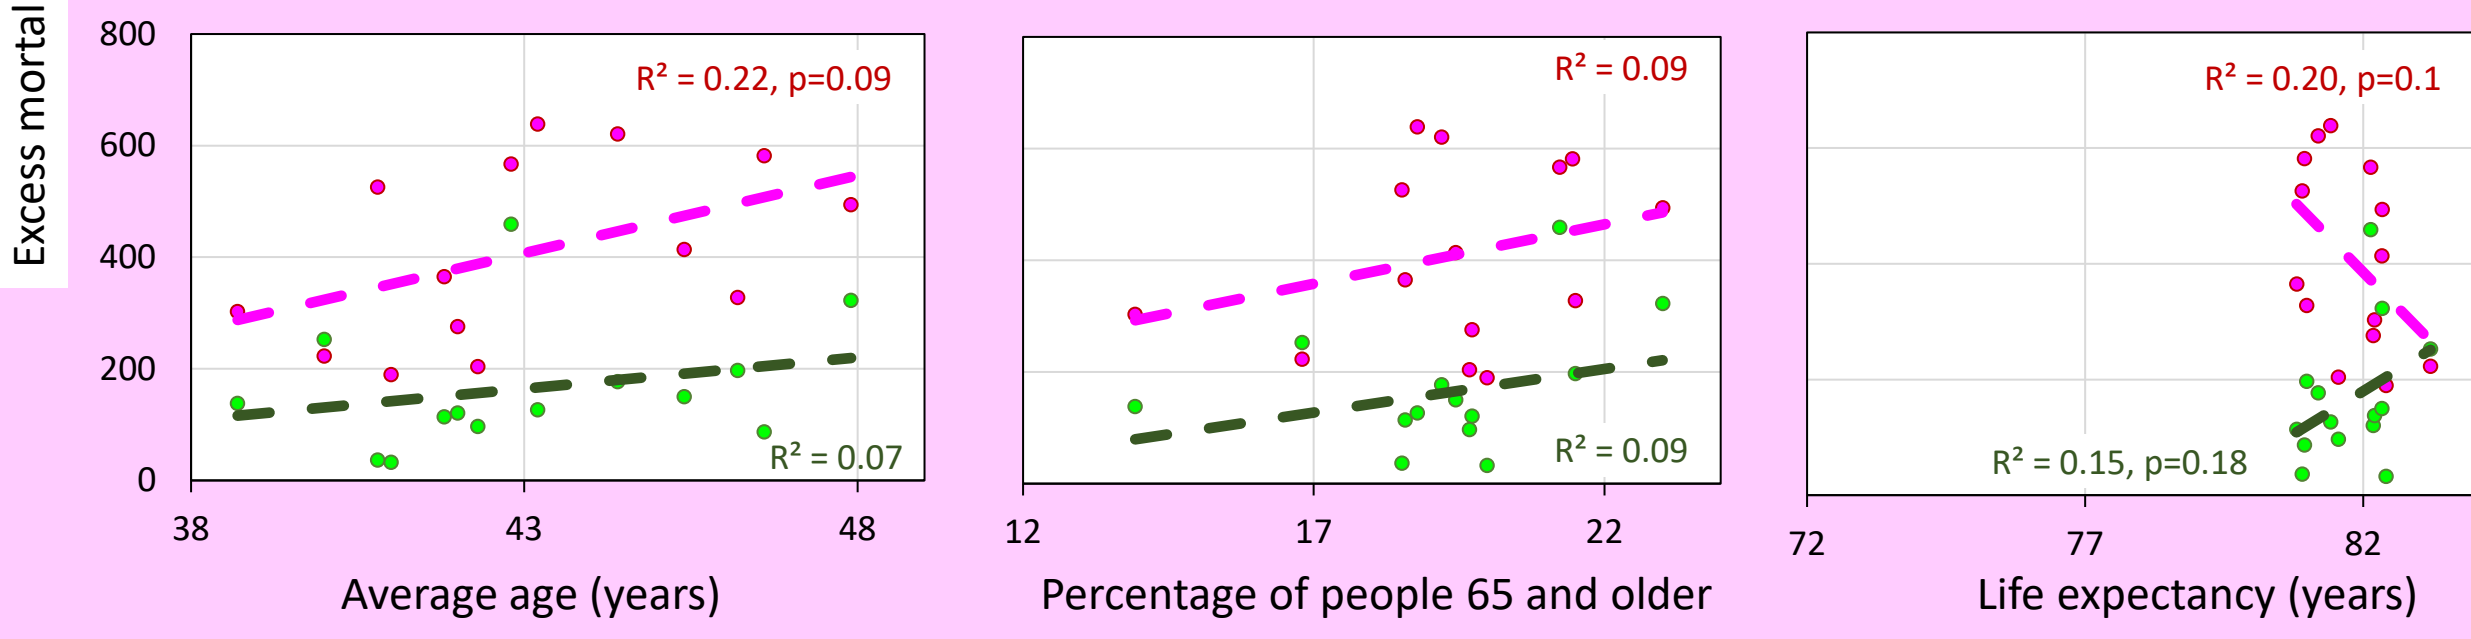

● Mortality during Delta period
 ● Mortality during Omicron BA.1/BA.2 period
